# Supplementary material for: Shower heat exchanger: reuse of energy from heated drinking water for CO&lt;sub&gt;2&lt;/sub&gt; reduction
Source: Copernicus journal article supplement (doi:10.5194/dwesd-8-119-2015), 2015-07-14
Supplement: Supplementary file 1 [file average-summer.xlsx]

## Sheet: energy savings
test low flow 5.2	shower
shower duration (min)	1	2	3	average efficiency
8	0.326	0.36	0.359	0.348333
10	0.429	0.452	0.454	0.445
12	0.531	0.545	0.549	0.541667
15	0.684	0.686	0.691	0.687
20	0.941	0.919	0.928	0.929333
25	1.197	1.151	1.164	1.17067
30	1.421	1.362	1.378	1.387
test high flow 6.8	shower
shower duration (min)	1	2	3	average efficiency
8	0.465	0.467	0.453	0.461667
10	0.587	0.581	0.57	0.579333
12	0.71	0.694	0.688	0.697333
15	0.893	0.864	0.864	0.873667
20	1.199	1.199	1.161	1.18633
25	1.505	1.44	1.462	1.469
30	1.781	1.698	1.733	1.73733
