# Supplementary material for: Shower heat exchanger: reuse of energy from heated drinking water for CO&lt;sub&gt;2&lt;/sub&gt; reduction
Source: Copernicus journal article supplement (doi:10.5194/dwesd-8-119-2015), 2015-07-14
Supplement: Supplementary file 1 [file dwesd-8-119-2015-supplement-cover-letter.pdf › dwesd-8-119-2015-supplement-cover-letter.pdf]

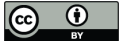

## *Supplement of*

# **Shower heat exchanger: reuse of energy from heated drinking water for CO<sub>2</sub> reduction**

**Z. Deng et al.**

*Correspondence to:* Z. Deng (z.deng@student.tudelft.nl)

- dwesd-8-119-2015-supplement-cover-letter.pdf
- \_\_MACOSX
  - .\_dwes-2015-3-supplement-version1
  - dwes-2015-3-supplement-version1
    - \* .\_DS\_Store
    - \* .\_Figure
    - \* .\_data&code
    - \* Figure
    - \* data&code
- dwes-2015-3-supplement-version1
  - .DS\_Store
  - Figure
    - \* Figure05(left).png
    - \* Figure05(right).png
    - \* Figure06.png
    - \* lab layout.vsd
    - \* layout.vsd
  - data&code
    - \* average-summer.xlsx
    - \* average-winter.xlsx
    - \* summer.m
    - \* winter.m

The copyright of individual parts of the supplement might differ from the CC-BY 3.0 licence.
