# Supplementary material for: Shower heat exchanger: reuse of energy from heated drinking water for CO&lt;sub&gt;2&lt;/sub&gt; reduction
Source: Copernicus journal article supplement (doi:10.5194/dwesd-8-119-2015), 2015-07-14
Supplement: Supplementary file 2 [file average-winter.xlsx]

## Sheet: 工作表1
		flow rate - 5.4 l/min					flow rate - 6.5 l /min
shower	duration	day1	day2	day3	average effeciency		day1	day2	day3	average efficiency
9:00-9:30	（min)
1	8	63.5	64.2	64.8	64.17		62.7	62.2	61.5	62.1333
	10	63.4	64.3	64.9	64.2		62.7	62.3	61.7	62.2333
	12	63.3	64.5	65	64.27		62.7	62.3	61.8	62.2667
	15	63.3	64.5	65.1	64.3		62.7	62.3	61.8	62.2667
	20	63.2	64.6	65.1	64.3		62.7	62.4	61.9	62.3333
	25	63.2	64.6	65.1	64.3		62.7	62.4	62	62.3667
	30	63.3	64.6	65.1	64.33		62.6	62.3	62	62.3
9:40-10:10
2	8	63.6	64.4	64.9	64.3		62.5	61.3	61.9	61.9
	10	63.6	64.4	65	64.33		62.4	61.4	62	61.9333
	12	63.5	64.4	65.1	64.33		62.3	61.4	62	61.9
	15	63.4	64.4	65.2	64.33		62.3	61.4	62	61.9
	20	63.3	64.4	65.2	64.3		62.2	61.5	62.1	61.9333
	25	63.4	64.4	65.3	64.37		62.1	61.5	62.1	61.9
	30	63.4	64.3	65.3	64.33		62	61.5	62.1	61.8667
AM 10:30:00-11:00
3	8	63.5	63.6	64.1	63.73		62.1	61	61.9	61.6667
	10	63.5	63.6	64.3	63.8		62.1	61.1	61.9	61.7
	12	63.5	63.7	64.3	63.83		62.1	61.2	61.9	61.7333
	15	63.6	63.8	64.5	63.97		62	61.2	61.9	61.7
	20	63.7	63.8	64.6	64.03		62	61.3	62	61.7667
	25	63.7	63.9	64.7	64.1		61.9	61.3	62	61.7333
	30	63.8	63.9	64.7	64.13		62	61.3	62	61.7667
11:30-12:00
4	8	63.8	63.7	64.1	63.87		61.8	60.7	61.4	61.3
	10	63.9	63.8	64.2	63.97		61.8	60.9	61.5	61.4
	12	63.9	63.9	64.3	64.03		61.9	61	61.7	61.5333
	15	63.9	63.9	64.4	64.07		62	61	61.8	61.6
	20	64	64	64.5	64.17		62	61.2	61.9	61.7
	25	64.1	64	64.6	64.23		62.1	61.2	62	61.7667
	30	64.2	64	64.6	64.27		62.1	61.2	62	61.7667
13:00-13:30
5	8	63.9	63.3	63.8	63.67		61.8	60.8	61.1	61.2333
	10	64	63.5	64	63.83		61.9	60.9	61.3	61.3667
	12	64.1	63.6	64.1	63.93		62	61	61.5	61.5
	15	64.1	63.8	64.3	64.07		62.2	61.1	61.7	61.6667
	20	64.1	63.9	64.5	64.17		62.3	61.3	61.8	61.8
	25	64.1	63.9	64.6	64.2		62.4	61.3	62	61.9
	30	64.1	64	64.7	64.27		62.4	61.4	62	61.9333
15:30-16:00
6	8	64	63.2	63.9	63.7		60.7	60.6	61.3	60.8667
	10	64	63.4	64.2	63.87		60.9	60.8	61.5	61.0667
	12	64.2	63.5	64.3	64		61	60.9	61.7	61.2
	15	64.2	63.5	64.4	64.03		61.2	61	61.8	61.3333
	20	64.2	63.6	64.5	64.1		61.3	61.2	61.9	61.4667
	25	64.2	63.6	64.6	64.13		61.4	61.3	62	61.5667
	30	64.2	63.7	64.6	64.17		61.4	61.4	62	61.6
